# Supplementary material for: Post-synthetic modification of supramolecular assemblies of β-diketonato Cu(ii) complexes: comparing and contrasting the molecular topology by crystal structure and quantum computational studies
Source: Royal Society of Chemistry journal article supplement (doi:10.1039/d1ce00304f), 2021-01-01
Supplement: d1ce00304f1.pdf [file d1ce00304f1.pdf]

### Supplementary file

**Table S1** Crystal data and structure refinement parameters of the homoleptic and heteroleptic Cu(II) complexes.

| Parameters                                      | Complex 1                                                                                                                                          | Complex 3                                                                                                                                          | Complex 4                                                                                                                                                                            |
|-------------------------------------------------|----------------------------------------------------------------------------------------------------------------------------------------------------|----------------------------------------------------------------------------------------------------------------------------------------------------|--------------------------------------------------------------------------------------------------------------------------------------------------------------------------------------|
| CCDC deposit No.                                | 2060389                                                                                                                                            | 2060391                                                                                                                                            | 2060390                                                                                                                                                                              |
| Empirical formula                               | [Cu(C <sub>14</sub> H <sub>8</sub> O <sub>2</sub> F <sub>3</sub> ) <sub>2</sub><br>(C <sub>2</sub> H <sub>6</sub> S <sub>1</sub> O <sub>1</sub> )] | [Cu(C <sub>14</sub> H <sub>8</sub> O <sub>2</sub> F <sub>3</sub> )<br>(C <sub>9</sub> H <sub>6</sub> N <sub>1</sub> O <sub>1</sub> )] <sub>2</sub> | [Cu(C <sub>14</sub> H <sub>8</sub> O <sub>2</sub> F <sub>3</sub> )<br>(C <sub>9</sub> H <sub>6</sub> N <sub>1</sub> O <sub>1</sub> )(C <sub>2</sub> H <sub>2</sub> O <sub>4</sub> )] |
| Formula weight                                  | 672.07                                                                                                                                             | 932.79                                                                                                                                             | 532.95                                                                                                                                                                               |
| Wavelength (Å)                                  | 0.71073                                                                                                                                            | 0.71073                                                                                                                                            | 0.71073                                                                                                                                                                              |
| Crystal system, space group                     | Triclinic, $P\bar{1}$                                                                                                                              | Monoclinic, $P2_1/n$                                                                                                                               | Monoclinic, $P2_1/n$                                                                                                                                                                 |
| Unit cell dimensions                            |                                                                                                                                                    |                                                                                                                                                    |                                                                                                                                                                                      |
| <i>a</i> (Å)                                    | 8.3115(12)                                                                                                                                         | 14.155(2)                                                                                                                                          | 11.762(4)                                                                                                                                                                            |
| <i>b</i> (Å)                                    | 12.377(8)                                                                                                                                          | 10.244(6)                                                                                                                                          | 15.669(6)                                                                                                                                                                            |
| <i>c</i> (Å)                                    | 14.844(2)                                                                                                                                          | 14.822(2)                                                                                                                                          | 12.864(5)                                                                                                                                                                            |
| <i>α</i> (°)                                    | 68.362(5)                                                                                                                                          | 90.00                                                                                                                                              | 90.00                                                                                                                                                                                |
| <i>β</i> (°)                                    | 86.264(6)                                                                                                                                          | 114.922(15)                                                                                                                                        | 107.927(8)                                                                                                                                                                           |
| <i>γ</i> (°)                                    | 81.552(6)                                                                                                                                          | 90.00                                                                                                                                              | 90.00                                                                                                                                                                                |
| Volume (Å <sup>3</sup> )                        | 1403.9(4)                                                                                                                                          | 1949(3)                                                                                                                                            | 2255.7(15)                                                                                                                                                                           |
| <i>Z</i>                                        | 2                                                                                                                                                  | 2                                                                                                                                                  | 4                                                                                                                                                                                    |
| Density(calcd) (Mg m <sup>-3</sup> )            | 1.590                                                                                                                                              | 1.590                                                                                                                                              | 1.569                                                                                                                                                                                |
| Absorption coefficient (mm <sup>-1</sup> )      | 0.932                                                                                                                                              | 1.174                                                                                                                                              | 1.031                                                                                                                                                                                |
| <i>F</i> <sub>000</sub>                         | 682                                                                                                                                                | 942                                                                                                                                                | 1084                                                                                                                                                                                 |
| Crystal size (mm <sup>3</sup> )                 | 0.27×0.31×0.18                                                                                                                                     | 0.41×0.43×0.25                                                                                                                                     | 0.23×0.33×0.27                                                                                                                                                                       |
| <i>θ</i> range for data collection              | 6.482 to 54.964                                                                                                                                    | 3.29° to 27.86°                                                                                                                                    | 3.09° to 27.48°                                                                                                                                                                      |
| Index ranges                                    | -10 ≤ <i>h</i> ≤ 10<br>-15 ≤ <i>k</i> ≤ 16<br>-19 ≤ <i>l</i> ≤ 11                                                                                  | -10 ≤ <i>h</i> ≤ 18<br>-13 ≤ <i>k</i> ≤ 13<br>-19 ≤ <i>l</i> ≤ 18                                                                                  | -15 ≤ <i>h</i> ≤ 15<br>-20 ≤ <i>k</i> ≤ 18<br>-16 ≤ <i>l</i> ≤ 8                                                                                                                     |
| Reflections collected                           | 8154                                                                                                                                               | 11192                                                                                                                                              | 11866                                                                                                                                                                                |
| Unique reflections                              | 6274 [ <i>R</i> <sub>int</sub> =0.0428]                                                                                                            | 4479 [ <i>R</i> <sub>int</sub> = 0.1199]                                                                                                           | 5089 [ <i>R</i> <sub>int</sub> =0.0435]                                                                                                                                              |
| Absorption correction                           | multi-scan                                                                                                                                         | multi-scan                                                                                                                                         | multi-scan                                                                                                                                                                           |
| Data/restraints/parameters                      | 6274/0/390                                                                                                                                         | 4479 / 0 / 280                                                                                                                                     | 5089 / 0 / 318                                                                                                                                                                       |
| Goodness-of-fit on <i>F</i> <sup>2</sup>        | 1.004                                                                                                                                              | 1.033                                                                                                                                              | 1.020                                                                                                                                                                                |
| Final [ <i>I</i> > 2σ( <i>I</i> )]              | <i>R</i> <sub>1</sub> = 0.0618                                                                                                                     | <i>R</i> <sub>1</sub> = 0.0891                                                                                                                     | <i>R</i> <sub>1</sub> = 0.0508                                                                                                                                                       |
| <i>R</i> indices (all data)                     | <i>R</i> <sub>1</sub> = 0.0928                                                                                                                     | <i>R</i> <sub>1</sub> = 0.1580                                                                                                                     | <i>R</i> <sub>1</sub> = 0.0844                                                                                                                                                       |
| Largest diff. peak and hole (eÅ <sup>-3</sup> ) | 0.91 and -1.09                                                                                                                                     | 0.639 and -0.793                                                                                                                                   | 0.618 and -0.328                                                                                                                                                                     |

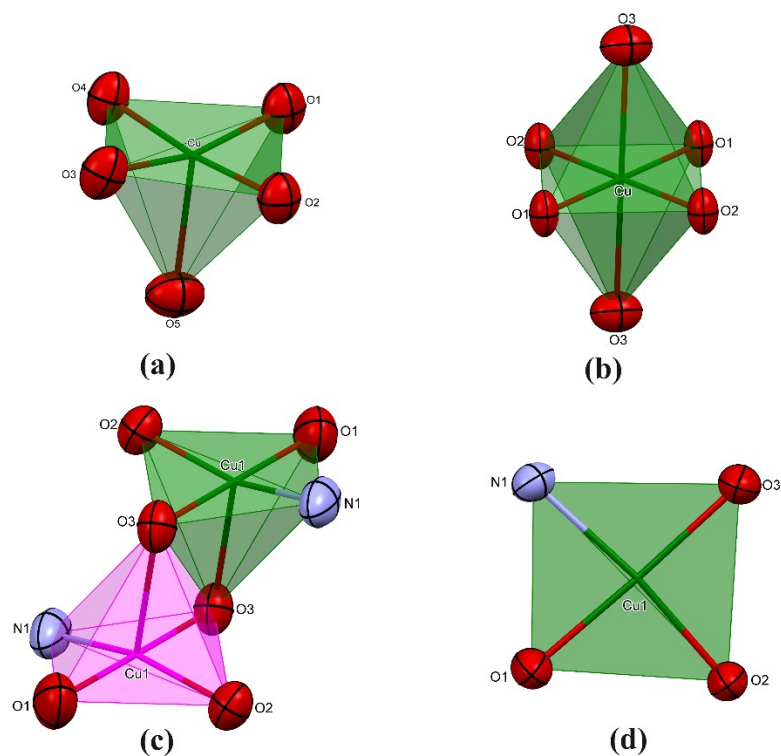

**Fig. S1** Five and six coordinated square pyramidal (a), and octahedral geometry (b) in homoleptic complexes (1 and 2). Square pyramidal geometry by the doubly phenoxide bridged inversion dimer (c) and square planar geometry (d) in heteroleptic complex 3 and 4 respectively.

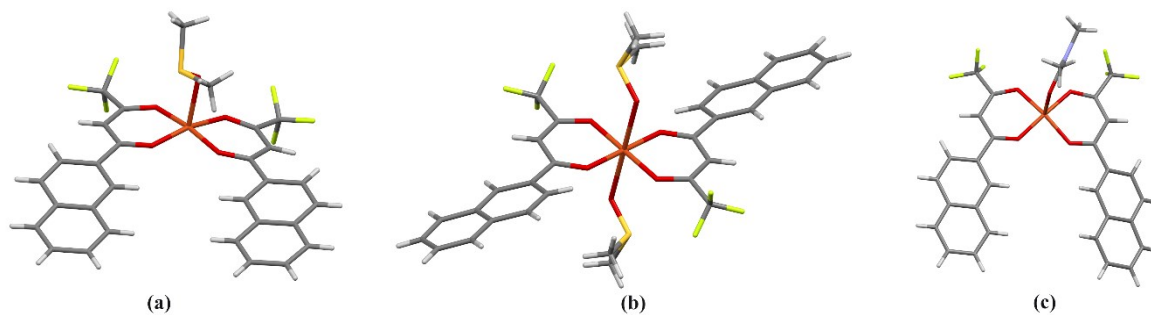

**Fig. S2** The solvatomorphic forms of homoleptic  $\beta$ -diketone based Cu(II) complexes.

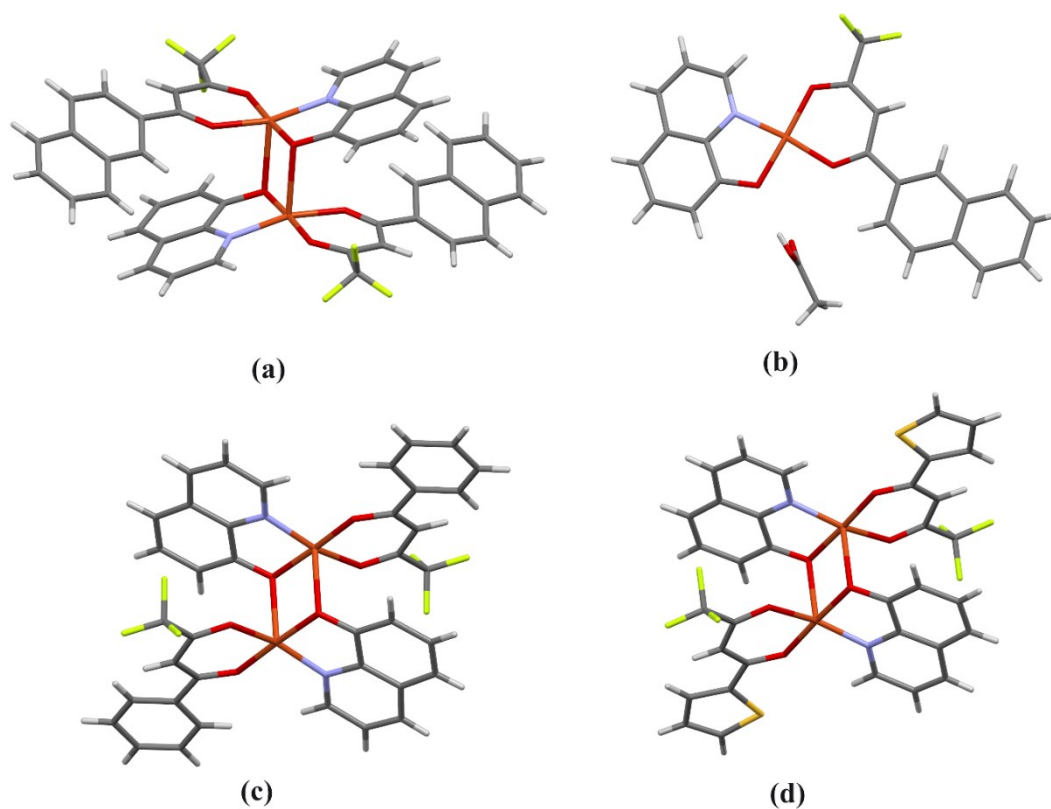

**Fig. S3** The solvatomorphic forms (a and b) of heteroleptic  $\beta$ -diketone and 8HQ Cu(II) complexes; (c) and (d) similar phenoxide bridged dinuclear Cu(II) complexes from CSD.

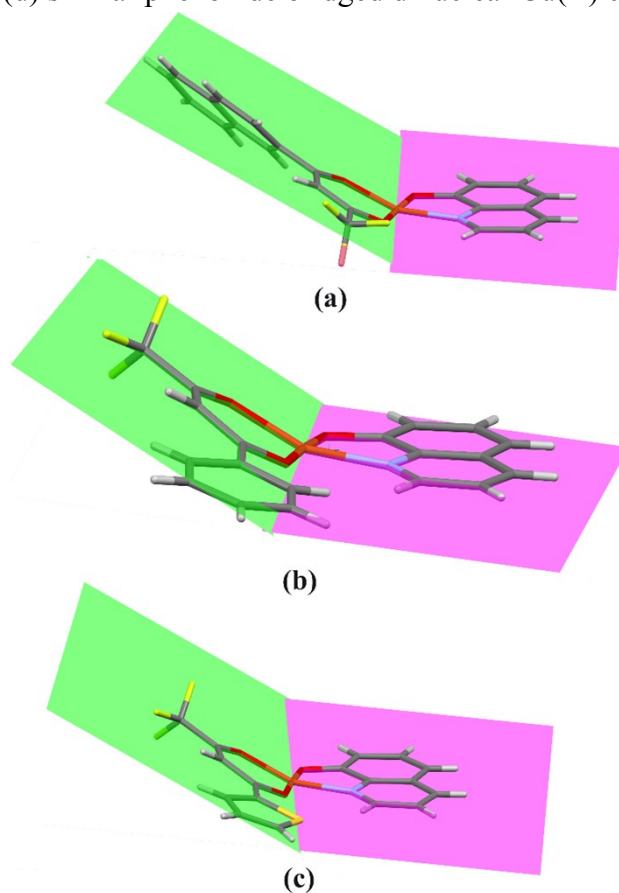

**Fig. S4** Envelope conformation in the heteroleptic complex 3 (a), and similar conformation in the phenoxide bridged dinuclear complex 6 (b) and 7 (c).

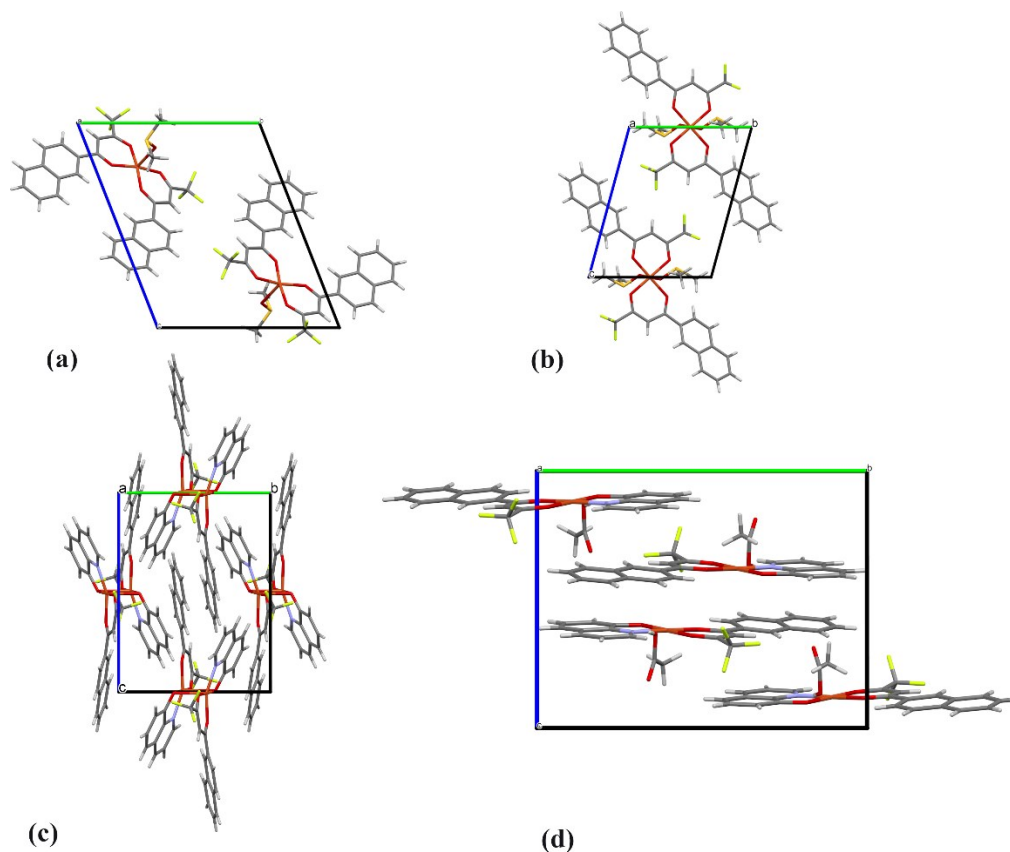

**Fig. S5** The projection of crystal packing of homoleptic Cu(II) complexes [(a) and (b)]; heteroleptic dinuclear and mononuclear complex [(c) and (d)] view down along *a*-axis.

**Table S2** Geometry of hydrogen bonds in homoleptic and heteroleptic Cu(II) complexes.

|           | D-H...A       | D-H<br>(Å) | H...A<br>(Å) | D...A<br>(Å) | D-H...A<br>(°) | Symmetry            |
|-----------|---------------|------------|--------------|--------------|----------------|---------------------|
| Complex 1 | C3-H3...F1    | 0.93       | 2.35         | 2.727(5)     | 104            | Intra               |
|           | C10-H10...O2  | 0.93       | 2.40         | 2.729(5)     | 100            | Intra               |
|           | C17-H17...F6  | 0.93       | 2.38         | 2.741(5)     | 103            | Intra               |
|           | C24-H24...O4  | 0.93       | 2.39         | 2.710(5)     | 100            | intra               |
|           | C29-H29C...O5 | 0.96       | 2.60         | 3.347(4)     | 135            | 1-x,1-y,-z          |
|           | C20-H20...F6  | 0.93       | 2.64         | 3.263        | 171            | 1-x,1-y,-z          |
|           | C7-H7...S1    | 0.93       | 2.96         | 3.852        | 150            | 1-x,1-y,-z          |
| Complex 3 | C3-H3...F1    | 0.93       | 2.41         | 2.738(13)    | 101            | Intra               |
|           | C15-H15...O1  | 0.93       | 2.58         | 3.040        | 110            | Intra               |
|           | C20-H20...F1  | 0.93       | 2.69         | 3.512        | 148            | 1/2+x,-1/2-y,-1/2+z |
| Complex 4 | C3-H3...F1    | 0.93       | 2.40         | 2.759(5)     | 103            | Intra               |
|           | C14-H14...O3  | 0.93       | 2.42         | 2.733(4)     | 100            | Intra               |
|           | C15-H15...O2  | 0.93       | 2.59         | 3.060(4)     | 112            | Intra               |
|           | O4-H4...O1    | 0.82       | 1.81         | 2.620(4)     | 171            | 1/2-x,-1/2+y,1/2-z  |
|           | C6-H6...O5    | 0.93       | 2.42         | 2.733(4)     | 100            | 1/2-x,-1/2+y,1/2-z  |

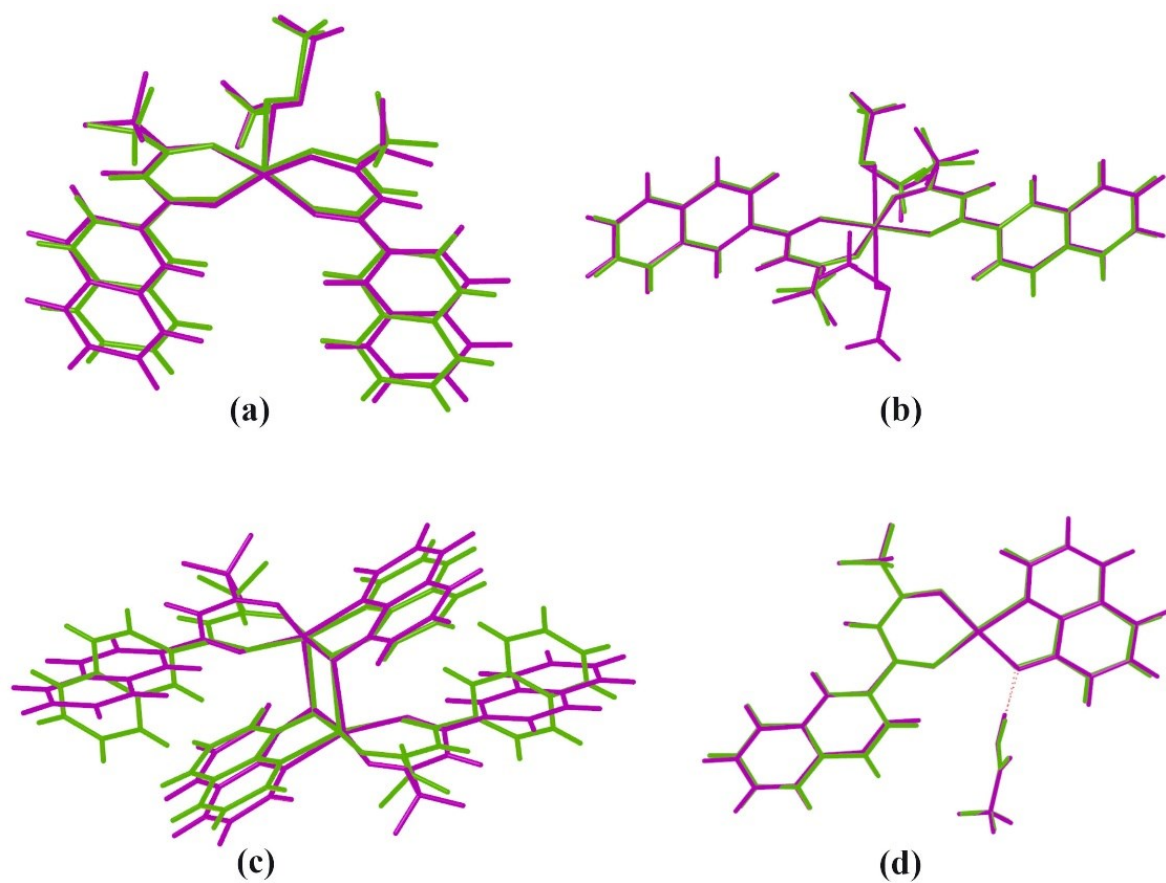

**Fig. S6** Overlay of crystal structure (green) and optimized electronic structure (pink) of the homoleptic (a and b) and heteroleptic complexes (c and d).

**Table S3** Comparison of experimental (XRD) and calculated (DFT) geometrical parameters of the complex 1.

| Sl. No.                        | Bond lengths in (Å) |       |               |       | Bond angles in (°)             |       |       |               |       |
|--------------------------------|---------------------|-------|---------------|-------|--------------------------------|-------|-------|---------------|-------|
|                                | Atom1               | Atom2 | XRD           | DFT   | Atom1                          | Atom2 | Atom3 | XRD           | DFT   |
| 1                              | Cu1                 | O3    | 1.942(3)      | 1.982 | O3                             | Cu1   | O2    | 169.0(1)      | 170.2 |
| 2                              | Cu1                 | O2    | 1.945(3)      | 1.985 | O3                             | Cu1   | O4    | 92.9(1)       | 90.7  |
| 3                              | Cu1                 | O4    | 1.939(3)      | 1.989 | O3                             | Cu1   | O1    | 88.8(1)       | 88.5  |
| 4                              | Cu1                 | O1    | 1.941(3)      | 1.986 | O3                             | Cu1   | O5    | 91.2(1)       | 93.4  |
| 5                              | Cu1                 | O5    | 2.235(2)      | 2.255 | O2                             | Cu1   | O4    | 84.0(1)       | 88.1  |
| 6                              | S1                  | O5    | 1.508(3)      | 1.548 | O2                             | Cu1   | O1    | 92.9(1)       | 90.6  |
| 7                              | S1                  | C30   | 1.772(4)      | 1.820 | O2                             | Cu1   | O5    | 99.4(1)       | 96.5  |
| 8                              | S1                  | C29   | 1.775(3)      | 1.818 | O4                             | Cu1   | O1    | 172.5(1)      | 167.7 |
| 9                              | F3                  | C1    | 1.336(4)      | 1.352 | O4                             | Cu1   | O5    | 91.8(1)       | 95.7  |
| 10                             | O3                  | C16   | 1.260(6)      | 1.268 | O1                             | Cu1   | O5    | 95.4(1)       | 96.6  |
| 11                             | F2                  | C1    | 1.341(5)      | 1.351 | O5                             | S1    | C30   | 106.0(2)      | 105.6 |
| 12                             | F5                  | C15   | 1.344(5)      | 1.351 | O5                             | S1    | C29   | 105.7(2)      | 104.8 |
| 13                             | F1                  | C1    | 1.332(6)      | 1.347 | C30                            | S1    | C29   | 99.0(2)       | 98.7  |
| 14                             | O2                  | C4    | 1.263(6)      | 1.268 | Cu1                            | O3    | C16   | 122.7(2)      | 124.2 |
| 15                             | F6                  | C15   | 1.323(6)      | 1.347 | Cu1                            | O2    | C4    | 127.9(2)      | 128.8 |
| 16                             | O4                  | C18   | 1.256(6)      | 1.267 | Cu1                            | O4    | C18   | 128.3(2)      | 128.6 |
| 17                             | O1                  | C2    | 1.277(6)      | 1.267 | Cu1                            | O1    | C2    | 122.5(2)      | 124.3 |
| 18                             | F4                  | C15   | 1.329(4)      | 1.352 | Cu1                            | O5    | S1    | 118.6(1)      | 125.6 |
| 19                             | C19                 | C20   | 1.413(7)      | 1.425 | C20                            | C19   | C18   | 123.4(3)      | 122.4 |
| 20                             | C19                 | C18   | 1.487(5)      | 1.491 | C20                            | C19   | C24   | 119.2(4)      | 119.1 |
| 21                             | C19                 | C24   | 1.379(6)      | 1.384 | C18                            | C19   | C24   | 117.5(3)      | 118.5 |
| 22                             | C16                 | C17   | 1.386(5)      | 1.383 | O3                             | C16   | C17   | 130.3(4)      | 129.8 |
| 23                             | C16                 | C15   | 1.535(7)      | 1.542 | O3                             | C16   | C15   | 112.7(3)      | 111.8 |
| 24                             | C20                 | C21   | 1.373(5)      | 1.372 | C17                            | C16   | C15   | 116.9(3)      | 118.4 |
| 25                             | C18                 | C17   | 1.426(6)      | 1.422 | O3                             | Cu1   | O2    | 169.0(1)      | 170.2 |
| <b>Correlation coefficient</b> |                     |       | <b>0.9978</b> |       | <b>Correlation coefficient</b> |       |       | <b>0.9938</b> |       |

| Sl. No.                        | Torsion angles in (°) |       |       |       |               |        |
|--------------------------------|-----------------------|-------|-------|-------|---------------|--------|
|                                | Atom1                 | Atom2 | Atom3 | Atom4 | XRD           | DFT    |
| 1                              | O2                    | Cu1   | O3    | C16   | -72.2(7)      | -86.1  |
| 2                              | O4                    | Cu1   | O3    | C16   | 1.5(3)        | -3.1   |
| 3                              | O1                    | Cu1   | O3    | C16   | -171.3(3)     | -170.8 |
| 4                              | O5                    | Cu1   | O3    | C16   | 93.4(3)       | 92.7   |
| 5                              | O3                    | Cu1   | O2    | C4    | -98.1(6)      | -87.1  |
| 6                              | O4                    | Cu1   | O2    | C4    | -172.6(3)     | -170.4 |
| 7                              | O1                    | Cu1   | O2    | C4    | 0.6(3)        | -2.6   |
| 8                              | O5                    | Cu1   | O2    | C4    | 96.5(3)       | 94.1   |
| 9                              | O3                    | Cu1   | O4    | C18   | -1.4(3)       | 3.8    |
| 10                             | O2                    | Cu1   | O4    | C18   | 168.0(3)      | 174.0  |
| 11                             | O1                    | Cu1   | O4    | C18   | 102.3(9)      | 89.8   |
| 12                             | O5                    | Cu1   | O4    | C18   | -92.7(3)      | -89.7  |
| 13                             | O3                    | Cu1   | O1    | C2    | 172.4(3)      | 172.2  |
| 14                             | O2                    | Cu1   | O1    | C2    | 3.2(3)        | 2.0    |
| 15                             | O4                    | Cu1   | O1    | C2    | 68.3(9)       | 85.9   |
| 16                             | O5                    | Cu1   | O1    | C2    | -96.5(3)      | -94.6  |
| 17                             | O3                    | Cu1   | O5    | S1    | -170.1(2)     | -162.3 |
| 18                             | O2                    | Cu1   | O5    | S1    | 7.1(2)        | 17.5   |
| 19                             | O4                    | Cu1   | O5    | S1    | -77.1(2)      | -71.3  |
| 20                             | O1                    | Cu1   | O5    | S1    | 100.9(2)      | 108.8  |
| 21                             | C30                   | S1    | O5    | Cu1   | 93.9(2)       | 94.2   |
| 22                             | C29                   | S1    | O5    | Cu1   | -161.6(2)     | -162.2 |
| 23                             | Cu1                   | O3    | C16   | C17   | -1.5(6)       | 1.3    |
| 24                             | Cu1                   | O3    | C16   | C15   | 175.5(2)      | -179.1 |
| 25                             | Cu1                   | O2    | C4    | C3    | -4.7(5)       | 1.8    |
| <b>Correlation coefficient</b> |                       |       |       |       | <b>0.9955</b> |        |

**Table S4** Comparison of experimental (XRD) and calculated (DFT) geometrical parameters of the heteroleptic dinuclear complex 3.

| Sl. No.                        | Bond lengths in (Å) |       |               |       | Bond angles in (°)             |       |       |               |       |
|--------------------------------|---------------------|-------|---------------|-------|--------------------------------|-------|-------|---------------|-------|
|                                | Atom1               | Atom2 | XRD           | DFT   | Atom1                          | Atom2 | Atom3 | XRD           | DFT   |
| 1                              | Cu1                 | O3    | 1.905(5)      | 2.030 | O3                             | Cu1   | O3    | 86.7(2)       | 83.2  |
| 2                              | Cu1                 | O2    | 1.941(4)      | 2.039 | O3                             | Cu1   | O2    | 89.8(2)       | 91.0  |
| 3                              | Cu1                 | O1    | 1.913(5)      | 1.987 | O3                             | Cu1   | O1    | 95.1(2)       | 103.0 |
| 4                              | Cu1                 | N1    | 1.979(5)      | 2.083 | O3                             | Cu1   | N1    | 108.7(2)      | 111.0 |
| 5                              | O3                  | C22   | 1.327(7)      | 1.310 | O3                             | Cu1   | O2    | 89.7(2)       | 95.1  |
| 6                              | O2                  | C4    | 1.23(1)       | 1.259 | O3                             | Cu1   | O1    | 177.2(2)      | 172.1 |
| 7                              | O1                  | C2    | 1.25(1)       | 1.267 | O3                             | Cu1   | N1    | 84.1(2)       | 80.5  |
| 8                              | N1                  | C23   | 1.34(1)       | 1.357 | O2                             | Cu1   | O1    | 92.4(2)       | 89.7  |
| 9                              | N1                  | C15   | 1.314(9)      | 1.320 | O2                             | Cu1   | N1    | 160.0(2)      | 156.7 |
| 10                             | C4                  | C5    | 1.479(9)      | 1.498 | O1                             | Cu1   | N1    | 93.3(2)       | 92.7  |
| 11                             | C4                  | C3    | 1.40(1)       | 1.425 | Cu1                            | O3    | Cu1   | 93.3(2)       | 96.7  |
| 12                             | C5                  | C14   | 1.40(1)       | 1.382 | Cu1                            | O3    | C22   | 111.1(4)      | 110.8 |
| 13                             | C5                  | C6    | 1.37(1)       | 1.423 | Cu1                            | O3    | C22   | 111.5(4)      | 112.4 |
| 14                             | C22                 | C23   | 1.403(9)      | 1.439 | Cu1                            | O2    | C4    | 127.1(4)      | 128.3 |
| 15                             | C22                 | C21   | 1.37(1)       | 1.396 | Cu1                            | O1    | C2    | 123.9(5)      | 125.0 |
| 16                             | C13                 | C14   | 1.393(9)      | 1.414 | Cu1                            | N1    | C23   | 110.4(4)      | 110.8 |
| 17                             | C13                 | C12   | 1.39(1)       | 1.421 | Cu1                            | N1    | C15   | 128.6(5)      | 129.0 |
| 18                             | C13                 | C8    | 1.41(2)       | 1.431 | C23                            | N1    | C15   | 120.6(6)      | 120.1 |
| 19                             | C23                 | C18   | 1.413(9)      | 1.419 | O2                             | C4    | C5    | 115.7(6)      | 116.5 |
| 20                             | F2                  | C1    | 1.26(1)       | 1.349 | O2                             | C4    | C3    | 124.5(7)      | 123.9 |
| 21                             | F3                  | C1    | 1.34(1)       | 1.346 | C5                             | C4    | C3    | 119.7(6)      | 119.6 |
| 22                             | C3                  | C2    | 1.36(1)       | 1.384 | C4                             | C5    | C14   | 117.3(6)      | 118.0 |
| 23                             | C12                 | C11   | 1.42(1)       | 1.373 | C4                             | C5    | C6    | 125.1(7)      | 123.0 |
| 24                             | C21                 | C20   | 1.36(1)       | 1.407 | C14                            | C5    | C6    | 117.5(7)      | 119.0 |
| 25                             | F1                  | C1    | 1.22(2)       | 1.349 | O3                             | C22   | C23   | 118.5(6)      | 118.4 |
| <b>Correlation coefficient</b> |                     |       | <b>0.9832</b> |       | <b>Correlation coefficient</b> |       |       | <b>0.9850</b> |       |

| Sl. No.                        | Torsion angles in (°) |       |       |       |               |        |
|--------------------------------|-----------------------|-------|-------|-------|---------------|--------|
|                                | Atom1                 | Atom2 | Atom3 | Atom4 | XRD           | DFT    |
| 1                              | O3                    | Cu1   | O3    | Cu1   | 0.0(1)        | 0.0    |
| 2                              | O3                    | Cu1   | O3    | C22   | 114.2(4)      | 125.5  |
| 3                              | O2                    | Cu1   | O3    | Cu1   | 89.8(2)       | 90.4   |
| 4                              | O2                    | Cu1   | O3    | C22   | -156.0(4)     | -144.1 |
| 5                              | O1                    | Cu1   | O3    | Cu1   | -133(4)       | -142.8 |
| 6                              | O1                    | Cu1   | O3    | C22   | -19(5)        | -17.3  |
| 7                              | N1                    | Cu1   | O3    | Cu1   | -109.2(2)     | -112.7 |
| 8                              | N1                    | Cu1   | O3    | C22   | 5.0(4)        | 12.8   |
| 9                              | O3                    | Cu1   | O2    | C4    | -101.5(5)     | -108.4 |
| 10                             | O3                    | Cu1   | O2    | C4    | 171.8(5)      | 168.4  |
| 11                             | O1                    | Cu1   | O2    | C4    | -6.4(6)       | -5.3   |
| 12                             | N1                    | Cu1   | O2    | C4    | 100.2(8)      | 90.5   |
| 13                             | O3                    | Cu1   | O1    | C2    | 95.0(6)       | 94.1   |
| 14                             | O3                    | Cu1   | O1    | C2    | -132(4)       | -123.9 |
| 15                             | O2                    | Cu1   | O1    | C2    | 5.0(6)        | 3.2    |
| 16                             | N1                    | Cu1   | O1    | C2    | -155.9(6)     | -153.6 |
| 17                             | O3                    | Cu1   | N1    | C23   | -90.0(5)      | -87.7  |
| 18                             | O3                    | Cu1   | N1    | C15   | 97.1(7)       | 96.5   |
| 19                             | O3                    | Cu1   | N1    | C23   | -5.4(5)       | -8.8   |
| 20                             | O3                    | Cu1   | N1    | C15   | -178.3(7)     | 175.4  |
| 21                             | O2                    | Cu1   | N1    | C23   | 67.1(8)       | 72.0   |
| 22                             | O2                    | Cu1   | N1    | C15   | -105.8(8)     | -103.8 |
| 23                             | O1                    | Cu1   | N1    | C23   | 173.4(5)      | 167.3  |
| 24                             | O1                    | Cu1   | N1    | C15   | 0.6(7)        | -8.6   |
| 25                             | Cu1                   | O3    | C22   | C23   | 98.7(6)       | 97.2   |
| <b>Correlation coefficient</b> |                       |       |       |       | <b>0.9977</b> |        |

**Table S5** Comparison of experimental (XRD) and calculated (DFT) geometrical parameters of the heteroleptic mononuclear complex 4.

| Sl. No.                        | Bond lengths in (Å) |       |               |       | Bond angles in (°)             |       |       |               |       |
|--------------------------------|---------------------|-------|---------------|-------|--------------------------------|-------|-------|---------------|-------|
|                                | Atom1               | Atom2 | XRD           | DFT   | Atom1                          | Atom2 | Atom3 | XRD           | DFT   |
| 1                              | Cu1                 | O2    | 1.919(2)      | 1.957 | O2                             | Cu1   | O3    | 93.23(9)      | 91.6  |
| 2                              | Cu1                 | O3    | 1.921(2)      | 1.959 | O2                             | Cu1   | O1    | 88.92(9)      | 91.7  |
| 3                              | Cu1                 | O1    | 1.925(2)      | 1.964 | O2                             | Cu1   | N1    | 173.5(0)      | 175.0 |
| 4                              | Cu1                 | N1    | 1.970(2)      | 2.008 | O3                             | Cu1   | O1    | 177.8(0)      | 176.8 |
| 5                              | O2                  | C4    | 1.263(3)      | 1.269 | O3                             | Cu1   | N1    | 93(0)         | 93.4  |
| 6                              | O3                  | C2    | 1.278(4)      | 1.274 | O1                             | Cu1   | N1    | 84.9(0)       | 83.3  |
| 7                              | O1                  | C22   | 1.330(4)      | 1.328 | Cu1                            | O2    | C4    | 128.7(0)      | 128.8 |
| 8                              | N1                  | C23   | 1.359(4)      | 1.365 | Cu1                            | O3    | C2    | 122.9(0)      | 123.9 |
| 9                              | N1                  | C15   | 1.325(5)      | 1.323 | Cu1                            | O1    | C22   | 112.3(0)      | 112.6 |
| 10                             | C22                 | C23   | 1.436(5)      | 1.429 | Cu1                            | N1    | C23   | 110.1(0)      | 110.6 |
| 11                             | C22                 | C21   | 1.377(5)      | 1.389 | Cu1                            | N1    | C15   | 130.1(0)      | 129.2 |
| 12                             | C5                  | C14   | 1.430(5)      | 1.426 | C23                            | N1    | C15   | 119.8(3)      | 120.2 |
| 13                             | C5                  | C6    | 1.368(4)      | 1.385 | O1                             | C22   | C23   | 116.7(3)      | 117.6 |
| 14                             | C5                  | C4    | 1.493(5)      | 1.487 | O1                             | C22   | C21   | 125.4(3)      | 124.9 |
| 15                             | F1                  | C1    | 1.307(4)      | 1.347 | C23                            | C22   | C21   | 118.0(3)      | 117.5 |
| 16                             | C14                 | C13   | 1.364(5)      | 1.370 | C14                            | C5    | C6    | 119.0(3)      | 119.2 |
| 17                             | C1                  | C2    | 1.536(5)      | 1.540 | C14                            | C5    | C4    | 118.4(3)      | 118.3 |
| 18                             | C1                  | F3    | 1.297(6)      | 1.350 | C6                             | C5    | C4    | 122.7(3)      | 122.5 |
| 19                             | C1                  | F2    | 1.317(4)      | 1.351 | C5                             | C14   | C13   | 120.7(3)      | 120.7 |
| 20                             | Cu1                 | O2    | 1.919(2)      | 1.957 | F1                             | C1    | C2    | 114.5(3)      | 113.7 |
| 21                             | C6                  | C7    | 1.415(5)      | 1.416 | F1                             | C1    | F3    | 107.9(3)      | 107.3 |
| 22                             | C12                 | C7    | 1.421(5)      | 1.431 | F1                             | C1    | F2    | 104.5(3)      | 107.3 |
| 23                             | C12                 | C13   | 1.413(4)      | 1.422 | C2                             | C1    | F3    | 110.9(3)      | 110.6 |
| 24                             | C12                 | C11   | 1.425(5)      | 1.418 | C2                             | C1    | F2    | 112.9(3)      | 110.6 |
| 25                             | C4                  | C3    | 1.428(5)      | 1.425 | O2                             | Cu1   | O3    | 93.23(9)      | 91.6  |
| <b>Correlation coefficient</b> |                     |       | <b>0.9970</b> |       | <b>Correlation coefficient</b> |       |       | <b>0.9979</b> |       |

| Sl. No.                        | Torsion angles in (°) |       |       |       |               |        |
|--------------------------------|-----------------------|-------|-------|-------|---------------|--------|
|                                | Atom1                 | Atom2 | Atom3 | Atom4 | XRD           | DFT    |
| 1                              | O3                    | Cu1   | O2    | C4    | 1.7(3)        | 0.8    |
| 2                              | O1                    | Cu1   | O2    | C4    | -177.9(3)     | -179.4 |
| 3                              | N1                    | Cu1   | O2    | C4    | 165.6(8)      | -173.3 |
| 4                              | O2                    | Cu1   | O3    | C2    | 1.7(3)        | -1.7   |
| 5                              | O1                    | Cu1   | O3    | C2    | 172(2)        | -178.9 |
| 6                              | N1                    | Cu1   | O3    | C2    | -176.5(3)     | 177.7  |
| 7                              | O2                    | Cu1   | O1    | C22   | -177.3(2)     | 179.0  |
| 8                              | O3                    | Cu1   | O1    | C22   | 13(3)         | -3.9   |
| 9                              | N1                    | Cu1   | O1    | C22   | 0.8(2)        | -0.5   |
| 10                             | O2                    | Cu1   | N1    | C23   | 16(1)         | -5.7   |
| 11                             | O2                    | Cu1   | N1    | C15   | -162.2(8)     | 174.1  |
| 12                             | O3                    | Cu1   | N1    | C23   | 179.5(2)      | -179.8 |
| 13                             | O3                    | Cu1   | N1    | C15   | 1.8(3)        | 0.0    |
| 14                             | O1                    | Cu1   | N1    | C23   | -1.0(2)       | 0.4    |
| 15                             | O1                    | Cu1   | N1    | C15   | -178.7(3)     | -179.9 |
| 16                             | Cu1                   | O2    | C4    | C5    | 177.2(2)      | 179.7  |
| 17                             | Cu1                   | O2    | C4    | C3    | -2.6(5)       | 0.4    |
| 18                             | Cu1                   | O3    | C2    | C1    | 172.8(2)      | -178.2 |
| 19                             | Cu1                   | O3    | C2    | C3    | -4.7(5)       | 1.7    |
| 20                             | Cu1                   | O1    | C22   | C23   | -0.5(4)       | 0.5    |
| 21                             | Cu1                   | O1    | C22   | C21   | 178.4(3)      | -179.6 |
| 22                             | Cu1                   | N1    | C23   | C22   | 0.9(3)        | -0.3   |
| 23                             | Cu1                   | N1    | C23   | C18   | -178.4(3)     | 179.7  |
| 24                             | C15                   | N1    | C23   | C22   | 178.9(3)      | 180.0  |
| 25                             | C15                   | N1    | C23   | C18   | -0.4(5)       | -0.1   |
| <b>Correlation coefficient</b> |                       |       |       |       | <b>0.9989</b> |        |
